# Supplementary material for: Plasma miRNA profiles associated with stable warfarin dosage in Chinese patients
Source: PeerJ. 2020 Oct 13;8:e9995. doi: 10.7717/peerj.9995 (PMC7566751; doi:10.7717/peerj.9995)
Supplement: Supplemental Information 1 — Baseline characteristics were compared by the Kruskal–Wallis test (for continuous variables) or Fisher’s exact test (for categorical variables) to analyze differences among the three groups. The relative expression level of target miRNAs (denoted by Ct) was corrected by cel-miR-39(Ct_= Ct_-Ct_cel-miR-39) and the reference sample(Ct_= Ct_sample -Ct_ref. sample),and then used as the data for subsequent statistical analyses. [file peerj-08-9995-s001.xlsx]

## Sheet: Sheet1 
Sample no.	△CtmiR-24-3p = CtmiR-24-3p-CtmiR-39	△△CtmiR-24-3p=△Ct sample-△Ct sample.8461）	△CtmiR-133b = CtmiR-133b-CtmiR-39	△△CtmiR-133b=△Ct sample-△Ct sample.8461）	△CtmiR-1276 = CtmiR-1276-CtmiR-39	△△CtmiR-1276=△Ct sample-△Ct sample.8461）	Sex(male:1, female:2)	Age(years old)	Weight（kg）	Height(cm)	Smoke(Yes:1,No:0)	Drink(Yes:1,No:0)	Drug(Yes:1,No:0)	Group(Low dose:1, Medium dose:2,High dose:3)	Warfarin Dose(mg/day)
8461	3.455	0	0.422752	0	3.18934	0	1	50	66.5	163.4	0	0	0	3	6
8408	6.8295	3.3745	0.532859	0.110106	6.96895	3.77961	1	76	65.6	163.4	0	0	0	1	2
8495	3.93	0.475	0.60918	0.186428	5.3784	2.18906	1	61	65.6	163.4	0	0	0	3	5
8549	1.064	-2.391	0.827229	0.404476	5.32776	2.13842	1	70	68	179	0	0	0	3	5.25
8228	8.1025	4.6475	1.48706	1.06431	5.90038	2.71104	2	68	65.6	163.4	0	0	0	3	6
8618	1.7475	-1.7075	2.04526	1.62251	7.69132	4.50198	2	45	65.6	163.4	0	0	0	3	7.5
8354	1.31	-2.145	2.47796	2.05521	6.6947	3.50536	1	61	71	163.4	0	0	0	2	3
8681	2.321	-1.134	2.76825	2.3455	7.18685	3.99751	1	77	70	160	0	0	0	1	1.88
8351	0.169	-3.286	3.04473	2.62198	6.95285	3.76351	2	51	65.6	163.4	0	0	0	2	3
8703	7.906	4.451	3.16933	2.74658	4.40201	1.21267	2	50	65.6	163.4	0	0	0	1	1.5
8603	1.7475	-1.7075	3.21653	2.79378	6.52856	3.33922	2	79	49.2	146	0	0	0	1	2
8359	1.546	-1.909	3.37327	2.95052	5.97249	2.78315	1	53	80	162	0	0	0	2	3
8245	9.1815	5.7265	3.55453	3.13178	6.33072	3.14138	2	49	65.6	163.4	0	0	0	3	5.25
8360	5.83	2.375	3.77217	3.34942	7.75295	4.56361	2	47	65.6	163.4	0	0	0	2	3
8723	6.773	3.318	4.47431	4.05156	7.56495	4.37561	1	70	65.6	163.4	0	0	0	1	1.75
8221	3.455	0	4.70465	4.28189	7.54015	4.35081	1	48	65.6	163.4	0	0	0	2	2.75
8450	7.4725	4.0175	4.76008	4.33733	7.32743	4.13809	1	66	65.6	163.4	0	0	0	1	2
8418	7.4415	3.9865	5.14739	4.72464	10.8538	7.66451	2	69	52	156	0	0	0	1	1.5
8628	7.4535	3.9985	5.16983	4.74708	7.64003	4.45069	2	51	56.7	161	0	0	0	1	1.5
8491	1.567	-1.888	5.17345	4.7507	4.86523	1.67589	2	64	65.6	163.4	0	0	0	3	4.5
8310	5.052	1.597	5.21461	4.79185	11.4403	8.25095	1	69	63.5	170	0	0	0	2	3
8277	5.043	1.588	5.30097	4.87822	7.49256	4.30322	2	66	65.6	163.4	0	0	0	2	2.25
8324	0.033	-3.422	5.36305	4.9403	10.6363	7.44699	2	62	65.6	163.4	0	0	0	1	1.5
8291	6.5585	3.1035	5.40482	4.98206	10.9497	7.76038	2	53	65.6	163.4	0	0	0	3	6.25
8328	4.047	0.592	5.43317	5.01042	9.81875	6.62941	2	73	65.6	163.4	0	0	0	2	3
8392	6.077	2.622	5.52053	5.09778	6.3449	3.15556	2	59	58.1	163.4	0	0	0	1	2
8187	7.4535	3.9985	5.57843	5.15568	5.7625	2.57316	1	59	65.6	163.4	0	0	0	3	5
8672	0.033	-3.422	5.58448	5.16172	8.54046	5.35112	2	52	50	153	0	0	0	1	1.5
8654	1.524	-1.931	5.60413	5.18138	10.9781	7.78876	2	68	65.6	163.4	0	0	0	3	4.5
8652	0.291	-3.164	5.61082	5.18807	11.0952	7.90588	2	60	65.6	163.4	0	0	0	3	6
8744	1.524	-1.931	5.6116	5.18885	3.33102	0.141681	2	55	62.5	160	0	0	0	3	4.5
8711	0.291	-3.164	5.66067	5.23792	4.51792	1.32858	2	49	65.6	163.4	0	0	0	3	4.5
8428	2.652	-0.803	5.93831	5.51556	11.2655	8.07613	2	75	93	166	0	0	0	3	5.25
8023	5.545	2.09	6.00031	5.57756	5.66598	2.47664	2	64	65	155	0	0	1	3	4.5
8556	3.1	-0.355	6.05152	5.62876	5.3581	2.16876	2	57	55	150	0	0	0	3	4.5
8452	2.525	-0.93	6.08873	5.66598	3.36825	0.178915	1	66	75	172	0	0	0	3	4.5
8697	6.445	2.99	6.09067	5.66792	7.16013	3.97079	2	64	65.6	163.4	0	0	0	1	2
8303	3.83	0.375	6.1119	5.68915	9.41479	6.22545	2	65	75	158	0	0	0	2	2.75
8188	8.372	4.917	6.13311	5.71036	7.03296	3.84362	2	50	56	160	0	0	0	2	3.75
8701	8.1025	4.6475	6.16525	5.7425	5.79511	2.60577	1	69	65.6	163.4	0	0	0	1	2
8315	5.8695	2.4145	6.22934	5.80659	11.8473	8.65795	2	50	65.6	163.4	0	0	0	3	5.25
8506	3.1	-0.355	6.25251	5.82976	11.2297	8.04035	2	77	65.6	163.4	0	0	0	1	1.5
8243	7.906	4.451	6.27594	5.85319	4.73013	1.54079	1	63	88	173	1	0	0	3	4.5
8283	6.773	3.318	6.37424	5.95148	5.3037	2.11436	1	49	69	163	0	0	0	3	4.5
8314	3.13	-0.325	6.608	6.18525	10.8548	7.66549	1	57	70	172	1	1	0	2	3
8416	2.4425	-1.0125	6.63607	6.21331	9.45787	6.26853	2	73	52	165	0	0	0	3	4.5
8590	0.2425	-3.2125	6.64813	6.22538	10.7475	7.55813	2	67	61.5	148	0	0	1	1	1.5
8326	2.321	-1.134	6.76895	6.3462	10.6158	7.42646	1	72	58.4	174	0	0	0	1	1.5
8217	1.524	-1.931	6.81366	6.39091	6.85033	3.66099	2	69	65.6	163.4	0	0	1	1	1.75
8206	0.291	-3.164	6.81664	6.39388	6.39638	3.20704	1	48	65	163.4	1	1	0	1	1.5
8338	5.934	2.479	6.81975	6.397	10.8296	7.6403	2	47	70	158	0	0	1	1	1.5
8747	1.524	-1.931	6.87788	6.45512	4.87207	1.68273	2	49	65.6	163.4	0	0	0	3	4.5
8305	3.205	-0.25	6.9066	6.48385	10.8403	7.65101	1	49	90	170	1	1	0	2	3
8319	6.4365	2.9815	6.96813	6.54538	11.0473	7.85799	2	68	65	155	0	0	0	3	4.5
8401	0.669	-2.786	7.05333	6.63057	11.5827	8.39332	2	59	65.6	163.4	0	0	0	1	1.25
8181	5.934	2.479	7.22919	6.80644	4.90295	1.71361	2	62	65.6	163.4	0	0	0	3	4.5
8335	3.82	0.365	7.24875	6.82599	8.07367	4.88433	1	51	58	156	0	0	0	2	3
8341	3.733	0.278	7.27934	6.85658	10.8729	7.68355	1	53	65.6	163.4	0	0	0	2	5
8586	3.3495	-0.1055	7.29431	6.87155	10.2823	7.09294	1	51	65.6	163.4	0	0	0	3	6
8572	3.3495	-0.1055	7.37446	6.95171	5.61329	2.42395	1	63	80	175	0	0	0	1	2
8498	5.2885	1.8335	7.49723	7.07447	6.85195	3.66261	2	59	65.6	163.4	0	0	0	1	1.88
8682	5.934	2.479	7.58889	7.16613	10.5976	7.40825	1	61	60	158	0	0	0	1	1.5
8252	2.805	-0.65	7.61952	7.19677	4.07804	0.8887	1	66	65.6	163.4	0	0	0	2	3
8316	1.765	-1.69	7.71361	7.29086	11.6053	8.41596	1	50	52	160	0	0	0	2	3
8251	4.007	0.552	7.79516	7.37241	5.36782	2.17848	2	64	47	152	0	0	0	2	3
8204	2.652	-0.803	7.80038	7.37763	8.24386	5.05452	1	69	65.6	163.4	0	0	0	2	2.25
8608	0.2425	-3.2125	7.85349	7.43074	10.9759	7.7866	2	58	65.6	163.4	0	0	0	3	5.25
8362	6.4345	2.9795	7.93609	7.51334	7.49894	4.3096	1	51	67.3	162	1	0	0	1	1.5
8207	2.525	-0.93	7.96872	7.54597	8.04029	4.85095	1	51	50	163.4	0	0	0	2	2.25
8313	2.069	-1.386	8.14452	7.72177	11.12	7.93063	2	78	85	162	0	0	0	2	3
8169	5.154	1.699	8.19803	7.77528	11.8473	8.65796	2	61	65.6	163.4	0	0	1	2	2.25
8347	6.445	2.99	8.2107	7.78795	9.03887	5.84953	1	64	79.8	170	1	1	0	1	1.5
8343	1.7475	-1.7075	8.57307	8.15032	10.9079	7.71851	1	74	82.6	175	1	0	0	2	3.75
8232	4.686	1.231	8.64848	8.22572	9.26083	6.07149	1	58	65	158	1	0	0	1	1.5
8379	6.8535	3.3985	8.68334	8.26058	11.4451	8.25579	1	56	89.5	180	1	1	0	3	4.5
8311	4.079	0.624	8.75734	8.33459	11.3482	8.1589	2	51	51.5	153	0	0	0	2	2.75
8259	6.903	3.448	8.79887	8.37612	6.00047	2.81113	2	78	63.5	161	0	0	0	2	3
8295	5.772	2.317	8.83865	8.4159	7.10476	3.91542	1	72	65.6	163.4	0	0	0	2	2.75
8742	5.2885	1.8335	8.84626	8.42351	4.67185	1.48251	2	49	61	161	0	0	1	1	0.75
8718	9.1815	5.7265	9.15457	8.73182	10.1188	6.92947	2	64	60	158	0	0	1	1	1.5
8250	1.064	-2.391	9.17683	8.75408	4.89379	1.70445	2	78	63.8	161	0	0	1	2	3
8238	1.567	-1.888	9.20688	8.78413	5.8138	2.62446	1	48	65.6	163.4	0	0	0	2	3
8300	3.718	0.263	9.65594	9.23319	11.0131	7.82371	2	63	65.6	163.4	0	0	0	2	3
8242	3.93	0.475	10.072	9.64925	5.78979	2.60045	1	56	65.6	163.4	0	0	0	2	3.75
8158	9.277	5.822	10.1724	9.74964	12.5219	9.33258	1	67	65.6	163.4	0	0	0	2	3
8175	1.43	-2.025	10.7427	10.3199	12.045	8.85571	1	78	72.6	168	0	1	0	1	1.5
8177	4.131	0.676	10.8819	10.4592	12.9064	9.71707	1	60	72	170	1	1	0	2	3
8256	8.974	5.519	11.2523	10.8295	7.33537	4.14603	1	68	65.6	163.4	0	0	0	2	2.75
8178	5.708	2.253	11.8595	11.4368	13.0122	9.82285	1	71	65.6	163.4	0	0	0	2	3
8173	6.392	2.937	12.205	11.7822	13.8879	10.6986	1	72	68.5	170	0	0	0	2	3
8164	4.694	1.239	12.2231	11.8003	13.2654	10.0761	2	49	65.6	163.4	0	0	0	3	5.25
8147	5.28	1.825	12.4259	12.0032	12.8679	9.67859	2	62	65.6	163.4	0	0	0	2	3
8145	3.101	-0.354	12.6343	12.2115	10.3007	7.11141	1	63	70	163.4	1	1	0	1	1.5
8156	5.415	1.96	12.7589	12.3362	13.8746	10.6852	2	68	50	154	0	0	0	2	3
8157	5	1.545	13.3802	12.9575	12.8352	9.64591	2	62	68	168	0	0	0	3	5.25
8344	3.723	0.268	13.5033	13.0805	9.93431	6.74497	2	58	50	160	0	0	0	2	3
8152	7.5	4.045	13.6966	13.2739	13.6062	10.4169	1	75	68	164	0	0	0	2	2.75
8151	9.893	6.438	13.9302	13.5075	11.7665	8.57721	1	68	60	173	1	0	0	2	2.25
8172	5.794	2.339	14.5306	14.1078	11.2639	8.07455	1	73	65	157	0	0	1	2	2.25
